# Supplementary material for: Implementation of a high sensitivity cardiac troponin I assay and risk of myocardial infarction or death at five years: observational analysis of a stepped wedge, cluster randomised controlled trial
Source: PubMed Central journal article supplement (PMC10680066; doi:10.1136/bmj-2023-075009), 2023-11-28

# **Implementation of a high sensitivity cardiac troponin I assay and risk of myocardial infarction or death at five years: observational analysis of a stepped wedge, cluster randomised controlled trial**

Kuan Ken Lee, M.D.,<sup>1\*</sup> Dimitrios Doudesis, Ph.D.,<sup>1,2\*</sup> Amy V. Ferry, Ph.D.,<sup>1</sup>  
Andrew R. Chapman, M.D.,<sup>1</sup> Dorien M. Kimenai, Ph.D.,<sup>1</sup> Takeshi Fujisawa, Ph.D.,<sup>1</sup>  
Anda Bularga, M.D.,<sup>1</sup> Matthew T.H. Lowry, M.D.,<sup>1</sup> Caelan Taggart, M.D.,<sup>1</sup>  
Stacey Schulberg, M.Sc.,<sup>1</sup> Ryan Wereski, M.D.,<sup>1</sup> Chris Tuck, B.Sc.,<sup>1</sup> Fiona E. Strachan,  
Ph.D.,<sup>2</sup> David E. Newby, M.D.,<sup>1</sup> Atul Anand, M.D.,<sup>1</sup> Anoop S.V. Shah, M.D.,<sup>1,3</sup>  
Nicholas L. Mills, M.D.<sup>1,2</sup> *on behalf of the High-STEACS Investigators*

<sup>1</sup> British Heart Foundation (BHF) Centre for Cardiovascular Science, University of Edinburgh, Edinburgh, UK.

<sup>2</sup> Usher Institute, University of Edinburgh, Edinburgh, UK.

<sup>3</sup> London School of Hygiene and Tropical Medicine, London, UK.

\* contributed equally

## **Corresponding Author:**

Professor Nicholas L Mills  
BHF/University Centre for Cardiovascular Science  
The University of Edinburgh  
Edinburgh EH16 4SA  
United Kingdom  
Telephone: 0044 131 242 6515  
E-mail: [nick.mills@ed.ac.uk](mailto:nick.mills@ed.ac.uk)

**Supplementary Text** : 1  
**Supplementary Tables** : 5  
**Supplementary Figures** : 4

## eText 1. Summary of procedures in the High-STEACS trial.

### Randomisation

Block randomisation was used with sites paired based on the expected number of presentations and one site randomised to early implementation and the other to late implementation. For pragmatic reasons (shared lab facilities out of hours), the Vale of Leven and Royal Alexandra Hospital, Paisley were grouped and randomised together. This enabled implementation of the high-sensitivity assay to occur on the same date at both sites and allowed the same lab processes to be followed at both sites. The randomisation sequence was generated by a programmer at the Edinburgh Clinical Trials Unit who was not otherwise involved in the study using computer generated pseudo-random numbers.

### Schematic of the High-STEACS trial design

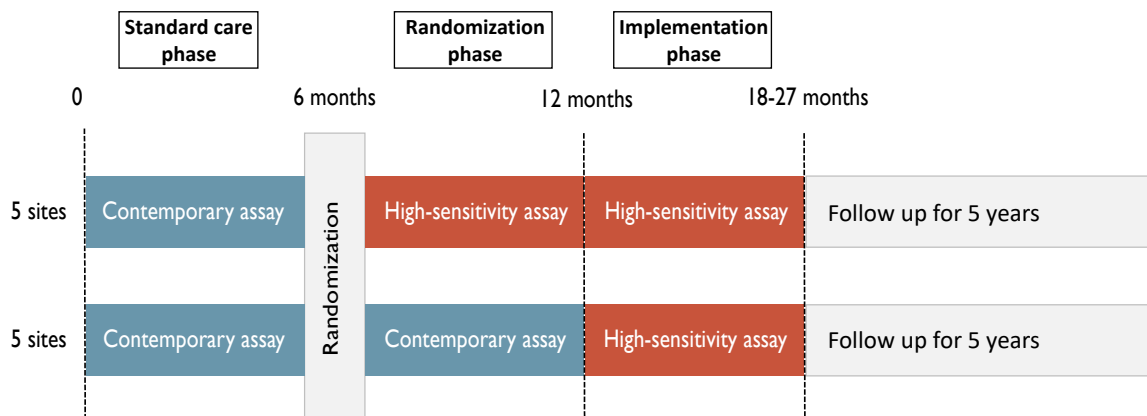

### Implementation support

To support implementation, we provided written educational material and presentations at each site, training for clinical and laboratory staff, and we updated the electronic patient record to highlight the change in assay and diagnostic thresholds. Educational material on the new assay, decision thresholds and diagnosis of myocardial infarction was presented at each Emergency Department handover (twice daily) during the implementation phase to ensure wide coverage

of staff on all shift patterns. This was reinforced by specialist chest pain nurses who received detailed training prior to implementation and who support Emergency Department clinicians in the assessment of patients with suspected acute coronary syndrome.

Key details from the educational presentation formed a one-page reference guide that was posted within each department and online in the hospital guidelines portal. This included guidance for diagnosis as per the universal definition of myocardial infarction. We encouraged clinicians to select only patients with suspected acute coronary syndrome for testing, and to consider etiology, including a detailed summary of the range of cardiac and non-cardiac conditions which may be responsible for myocardial injury. This information was also presented to the wider hospital teams in medical grand round presentations prior to implementation and circulated to all general practitioners.

Every high-sensitivity cardiac troponin result reported in the electronic health record during the implementation phase was accompanied with guidance notes outlining the new assay, reporting units and thresholds. Laboratory staff also received training to ensure any queries directed to the laboratory were dealt with consistently. Finally, the research team included senior cardiologists, emergency physicians, and cardiology nurses who are clinically active within each of the hospital clusters; education was therefore reinforced at a local level by these clinical leaders throughout the implementation phase.

### **Adjudication of cardiac and non-cardiac causes of non-ischaemic myocardial injury**

In addition to adjudicating the index diagnosis in all patients with hs-cTnI concentrations above the sex-specific 99<sup>th</sup> centile, in those with non-ischaemic myocardial injury the underlying cause was recorded prospectively and stratified as either cardiac or non-cardiac according to a

list of prespecified conditions. Cardiac diagnoses included acute heart failure, chronic heart failure, hypertensive heart disease, cardiomyopathy, takotsubo cardiomyopathy, valvular heart disease, myopericarditis, recent myocardial infarction, arrhythmia, or acute aortic dissection, whereas non-cardiac diagnoses included acute kidney injury, gastrointestinal bleed, pulmonary embolism, sepsis, chronic kidney disease, chronic obstructive pulmonary disease, and all other conditions.

### **Outcomes**

All in-hospital and community deaths, and all hospital admissions are recorded on the Register of Deaths in Scotland and the Scottish Morbidity Record (SMR), respectively. It is a statutory requirement that any deaths occurring in Scotland, or outwith Scotland but within the United Kingdom are entered on the Register of Deaths in Scotland within eight days of death. As such, this registry is 100% complete for the study population, which was restricted to those who reside in Scotland. This assumes that patients did not emigrate in the year following enrolment. However, the Scottish population is very stable, with low levels of emigration outwith the United Kingdom.

The primary outcome was myocardial infarction or all-cause death at 5 years. Secondary outcomes include myocardial infarction, coronary revascularisation, cardiovascular death, cardiac death, all-cause death, hospitalisation for heart failure, ischaemic stroke, and major haemorrhage. International Classification of Disease (ICD)-10 codes were used to define myocardial infarction (I21, I22), heart failure (I50), ischaemic stroke (I63, I65, or I66), cardiovascular death (I00-I99) and cardiac death (I05-I09, I20-I25, or I30-I51). Bleeding was defined according to the Bleeding Academic Research Consortium (BARC) definition using

ICD-10 and Office of Population Censuses and Surveys (OPCS) codes to classify each bleeding event. Major haemorrhage was defined as BARC type 3 or type 5.

### **Data Sharing**

The High-STEACS trial makes use of multiple routine electronic health care data sources that are linked, deidentified and held in our national safe haven, which is accessible by approved individuals who have undertaken the necessary governance training. Summary data can be made available upon request to the corresponding author (email: [nick.mills@ed.ac.uk](mailto:nick.mills@ed.ac.uk)).

**eTable 1.** Baseline characteristics of trial participants stratified by index diagnosis

|                                    | No myocardial injury |                | Non-ischaemic myocardial injury |                | Type 1 myocardial infarction |                | Type 2 myocardial infarction |                |
|------------------------------------|----------------------|----------------|---------------------------------|----------------|------------------------------|----------------|------------------------------|----------------|
|                                    | Standard care        | Implementation | Standard care                   | Implementation | Standard care                | Implementation | Standard care                | Implementation |
| No. of participants                | 14,862               | 23,060         | 1,118                           | 1,692          | 1,807                        | 3,221          | 462                          | 798            |
| Age, years                         | 59 (47, 73)          | 57 (46, 71)    | 79 (68, 85)                     | 78 (67, 85)    | 69 (58, 80)                  | 68 (57, 78)    | 77 (67, 84)                  | 77 (66, 84)    |
| Women                              | 7,042 (47%)          | 10,529 (46%)   | 670 (60)                        | 1,003 (59)     | 748 (41)                     | 1,262 (39)     | 275 (60)                     | 425 (53)       |
| <b>Presenting complaint*</b>       |                      |                |                                 |                |                              |                |                              |                |
| Chest pain                         | 8,677 (83%)          | 19,414 (84%)   | 315 (40)                        | 722 (43)       | 1,238 (89)                   | 2,869 (89)     | 257 (72)                     | 569 (71)       |
| Dyspnea                            | 383 (4%)             | 724 (3%)       | 196 (25)                        | 394 (23)       | 64 (5)                       | 107 (3)        | 33 (9)                       | 100 (13)       |
| Palpitation                        | 291 (3%)             | 700 (3%)       | 34 (4)                          | 99 (6)         | 6 (0)                        | 12 (0)         | 32 (9)                       | 41 (5)         |
| Syncope                            | 567 (5%)             | 1,242 (5%)     | 151 (19)                        | 256 (15)       | 30 (2)                       | 72 (2)         | 18 (5)                       | 32 (4)         |
| Other                              | 490 (5%)             | 968 (4%)       | 101 (13)                        | 221 (13)       | 60 (4)                       | 161 (5)        | 16 (4)                       | 56 (7)         |
| <b>Past medical history</b>        |                      |                |                                 |                |                              |                |                              |                |
| Myocardial infarction              | 1,353 (9%)           | 1,482 (6%)     | 143 (13)                        | 201 (12)       | 301 (17)                     | 384 (12)       | 73 (16)                      | 110 (14)       |
| Cerebrovascular disease            | 877 (6%)             | 1,038 (5%)     | 154 (14)                        | 186 (11)       | 132 (7)                      | 236 (7)        | 63 (14)                      | 91 (11)        |
| Diabetes mellitus                  | 961 (6%)             | 1,079 (5%)     | 155 (14)                        | 193 (11)       | 302 (17)                     | 507 (16)       | 66 (14)                      | 105 (13)       |
| <b>Previous revascularisation</b>  |                      |                |                                 |                |                              |                |                              |                |
| PCI                                | 1,204 (8%)           | 1,540 (7%)     | 76 (7)                          | 135 (8)        | 198 (11)                     | 315 (10)       | 42 (9)                       | 63 (8)         |
| CABG                               | 238 (2%)             | 296 (1%)       | 28 (3)                          | 45 (3)         | 47 (3)                       | 59 (2)         | 16 (3)                       | 22 (3)         |
| <b>Medications at presentation</b> |                      |                |                                 |                |                              |                |                              |                |
| Aspirin                            | 4,231 (28%)          | 5,231 (23%)    | 433 (39)                        | 567 (34)       | 682 (38)                     | 1,042 (32)     | 211 (46)                     | 318 (40)       |
| Dual anti-platelet therapy†        | 583 (4%)             | 520 (2%)       | 66 (6)                          | 66 (4)         | 124 (7)                      | 117 (4)        | 30 (6)                       | 39 (5)         |
| Statin                             | 5,994 (40%)          | 8,112 (35%)    | 607 (54)                        | 840 (50)       | 906 (50)                     | 1,503 (47)     | 272 (59)                     | 447 (56)       |
| ACE inhibitor or ARB               | 4,681 (31%)          | 6,604 (29%)    | 467 (42)                        | 735 (43)       | 755 (42)                     | 1,265 (39)     | 238 (52)                     | 340 (43)       |
| Beta-blocker                       | 4,183 (28%)          | 5,383 (23%)    | 402 (36)                        | 564 (33)       | 648 (36)                     | 974 (30)       | 227 (49)                     | 316 (40)       |
| Oral anti-coagulant‡               | 938 (6%)             | 1,220 (5%)     | 161 (14)                        | 238 (14)       | 112 (6)                      | 181 (6)        | 82 (18)                      | 113 (14)       |

|                                           |                |                |                |                |                 |                    |                |                |
|-------------------------------------------|----------------|----------------|----------------|----------------|-----------------|--------------------|----------------|----------------|
| <b>Electrocardiogram§</b>                 |                |                |                |                |                 |                    |                |                |
| Normal                                    |                |                | 254 (36)       | 472 (36)       | 582 (39)        | 1,015 (35)         | 82 (20)        | 152 (21)       |
| Myocardial ischaemia                      |                |                | 54 (8)         | 97 (7)         | 566 (38)        | 1,325 (46)         | 134 (32)       | 279 (38)       |
| ST-segment elevation                      |                |                | 19 (3)         | 53 (4)         | 232 (16)        | 647 (22)           | 9 (2)          | 29 (4)         |
| ST-segment depression                     |                |                | 49 (7)         | 59 (5)         | 281 (19)        | 592 (20)           | 109 (26)       | 202 (27)       |
| T-wave inversion                          |                |                | 101 (14)       | 147 (11)       | 282 (19)        | 505 (17)           | 74 (18)        | 118 (16)       |
| <b>Physiological parameters</b>           |                |                |                |                |                 |                    |                |                |
| Heart rate, beats per minute              |                |                | 87 (71, 105)   | 86 (70, 106)   | 77 (67, 91)     | 76 (64, 90)        | 94 (75, 124)   | 99 (78, 124)   |
| Systolic blood pressure, mmHg             |                |                | 133 (117, 154) | 135 (117, 154) | 140 (122, 158)  | 141 (124, 160)     | 132 (111, 151) | 130 (113, 152) |
| <b>Haematology and clinical chemistry</b> |                |                |                |                |                 |                    |                |                |
| Haemoglobin, g/L                          | 138 (127, 149) | 139 (128, 150) | 129 (113, 143) | 129 (115, 143) | 137 (122, 149)  | 139 (125, 151)     | 129 (110, 145) | 132 (115, 146) |
| eGFR, mL/min                              | 95 (81, 107)   | 96 (82, 107)   | 68 (44, 85)    | 68 (45, 86)    | 82 (61, 95)     | 82 (61, 95)        | 70 (48, 86)    | 69 (48, 87)    |
| Peak hs-cTnI, ng/L                        | 3 (1, 6)       | 3 (1, 6)       | 65 (35, 222)   | 62 (36, 197)   | 528 (84, 4,434) | 1,117 (124, 8,411) | 102 (47, 551)  | 125 (47, 523)  |

Presented as No. (%), median (inter-quartile range).

Abbreviations: ACE = angiotensin converting enzyme; ARB = angiotensin receptor blockers; eGFR = estimated glomerular filtration rate;

CABG = coronary artery bypass grafting; PCI = percutaneous coronary intervention. \*Presenting symptom was missing in 4,466 (12%) patients.

†Two medications from aspirin, clopidogrel, prasugrel or ticagrelor. ‡Includes warfarin or direct oral anticoagulants. §Electrocardiographic

findings and physiological parameters only reported for those with elevation in cardiac troponin concentrations.

**eTable 2.** Management during index hospital admission stratified by peak troponin concentration and study phase

|                                 | No myocardial injury |                | Myocardial injury or infarction |                |                          |                |
|---------------------------------|----------------------|----------------|---------------------------------|----------------|--------------------------|----------------|
|                                 | Standard care        | Implementation | Reclassified by hs-cTnI assay   |                | Identified by cTnI assay |                |
|                                 |                      |                | Standard care                   | Implementation | Standard care            | Implementation |
| No. of participants             | 14,862 (39)          | 23,060 (61)    | 720 (41)                        | 1,051 (59)     | 3,396 (40)               | 5,193 (60)     |
| Duration of stay, hrs           | 7 (3, 24)            | 4 (3, 20)      | 21 (4, 100)                     | 51 (20, 133)   | 82 (19, 186)             | 78 (37, 164)   |
| Coronary angiography*           | 204 (1)              | 329 (1)        | 29 (4)                          | 111 (11)       | 1,108 (33)               | 2,177 (42)     |
| PCI/CABG                        | 112 (1)              | 187 (1)        | 23 (3)                          | 51 (5)         | 706 (21)                 | 1,535 (30)     |
| New anti-platelet agent         | 795 (5)              | 976 (4)        | 64 (9)                          | 194 (18)       | 1,408 (41)               | 2,428 (47)     |
| New dual anti-platelet therapy† | 248 (2)              | 336 (1)        | 35 (5)                          | 124 (12)       | 1,144 (34)               | 2,080 (40)     |
| New statin therapy              | 419 (3)              | 608 (3)        | 32 (4)                          | 79 (8)         | 660 (19)                 | 1,263 (24)     |
| New ACE inhibitor or ARB        | 287 (2)              | 479 (2)        | 34 (5)                          | 77 (7)         | 671 (20)                 | 1,163 (22)     |
| New beta-blocker                | 765 (5)              | 1,092 (5)      | 65 (9)                          | 164 (16)       | 828 (24)                 | 1,502 (29)     |

Presented as No. (%), median (inter-quartile range).

\* Angiography and revascularisation within 30 days of presentation

† Two medications from aspirin, clopidogrel, prasugrel or ticagrelor



**eTable 3.** Management during index hospital admission stratified by diagnosis and study phase

|                                 | No myocardial injury |                | Non- <i>ischaemic</i> myocardial injury |                | Type 1 myocardial infarction |                | Type 2 myocardial infarction |                |
|---------------------------------|----------------------|----------------|-----------------------------------------|----------------|------------------------------|----------------|------------------------------|----------------|
|                                 | Standard care        | Implementation | Standard care                           | Implementation | Standard care                | Implementation | Standard care                | Implementation |
| No. of participants             | 14,862               | 23,060         | 1,118                                   | 1,692          | 1,807                        | 3,221          | 462                          | 798            |
| Duration of stay, hrs           | 7 (3, 24)            | 4 (3, 20)      | 128 (27, 305)                           | 103 (28, 263)  | 75 (26, 134)                 | 74 (46, 124)   | 109 (47, 233)                | 94 (37, 199)   |
| Coronary angiography*           | 204 (1)              | 329 (1)        | 38 (3)                                  | 85 (5)         | 1,024 (57)                   | 2,093 (65)     | 38 (8)                       | 83 (10)        |
| PCI/CABG                        | 112 (1)              | 187 (1)        | 6 (1)                                   | <5 (0)         | 700 (39)                     | 1,553 (48)     | 6 (1)                        | 14 (2)         |
| New anti-platelet agent         | 795 (5)              | 976 (4)        | 130 (12)                                | 196 (12)       | 1,160 (64)                   | 2,232 (69)     | 80 (17)                      | 140 (18)       |
| New dual anti-platelet therapy† | 248 (2)              | 336 (1)        | 64 (6)                                  | 87 (5)         | 1,000 (55)                   | 2,003 (62)     | 47 (10)                      | 78 (10)        |
| New statin therapy              | 419 (3)              | 608 (3)        | 51 (5)                                  | 76 (4)         | 577 (32)                     | 1,194 (37)     | 29 (6)                       | 47 (6)         |
| New ACE inhibitor or ARB        | 287 (2)              | 479 (2)        | 64 (6)                                  | 112 (7)        | 566 (31)                     | 1,027 (32)     | 37 (8)                       | 71 (9)         |
| New beta-blocker                | 765 (5)              | 1,092 (5)      | 106 (9)                                 | 198 (12)       | 645 (36)                     | 1,242 (39)     | 67 (15)                      | 171 (21)       |

Presented as No. (%), median (inter-quartile range).

\* Angiography and revascularisation within 30 days of presentation

† Two medications from aspirin, clopidogrel, prasugrel or ticagrelor

**eTable 4.** Cox-proportional hazards model for subsequent myocardial infarction or all-cause death at 5 years stratified by index diagnosis

|                                 | <b>Adjusted hazard ratios</b> |
|---------------------------------|-------------------------------|
| <b>UDMI 3</b>                   |                               |
| Type 1                          | 0.92 [0.83-1.01]              |
| Type 2                          | 0.98 [0.84-1.14]              |
| Non-ischaemic myocardial injury | 0.83 [0.75-0.91]              |
|                                 |                               |
| <b>UDMI 4</b>                   |                               |
| Type 1                          | 0.92 [0.84-1.01]              |
| Type 2                          | 0.95 [0.80-1.11]              |
| Non-ischaemic myocardial injury | 0.85 [0.77-0.94]              |

\* Cox-proportional hazards model adjusting for hospital site as random effect, season, age, sex, diabetes mellitus, previous myocardial infarction and previous cerebrovascular disease

Abbreviations: UDMI= universal definition of myocardial infarction

**eTable 5.** Outcomes after 5 years in participants stratified by index diagnosis

|                                                 | No myocardial injury |                | Non-ischaemic myocardial injury |                | Type 1 myocardial infarction |                | Type 2 myocardial infarction |                |
|-------------------------------------------------|----------------------|----------------|---------------------------------|----------------|------------------------------|----------------|------------------------------|----------------|
|                                                 | Standard care        | Implementation | Standard care                   | Implementation | Standard care                | Implementation | Standard care                | Implementation |
| No. of participants                             | 14,862               | 23,060         | 1,118                           | 1,692          | 1,807                        | 3,221          | 462                          | 798            |
| <b>Myocardial infarction or all-cause death</b> | 3,194 (21)           | 4,361 (19)     | 804 (72)                        | 1,064 (63)     | 827 (46)                     | 1,342 (42)     | 268 (58)                     | 457 (57)       |
| <b>Myocardial infarction</b>                    | 584 (4)              | 757 (3)        | 108 (10)                        | 108 (6)        | 333 (18)                     | 526 (16)       | 46 (10)                      | 74 (9)         |
| <b>Coronary revascularisation</b>               | 729 (5)              | 808 (4)        | 37 (3)                          | 43 (3)         | 200 (11)                     | 271 (8)        | 16 (3)                       | 32 (4)         |
| <b>All-cause death</b>                          | 2,804 (19)           | 3,837 (17)     | 765 (68)                        | 1,023 (60)     | 663 (37)                     | 1,040 (32)     | 246 (53)                     | 432 (54)       |
| <b>Death from cardiovascular causes</b>         | 841 (6)              | 1,186 (5)      | 322 (29)                        | 447 (26)       | 356 (20)                     | 592 (18)       | 108 (23)                     | 212 (27)       |
| <b>Death from cardiac causes</b>                | 569 (4)              | 803 (3)        | 229 (20)                        | 333 (20)       | 309 (17)                     | 498 (15)       | 89 (19)                      | 168 (21)       |
| <b>Hospital admission for heart failure</b>     | 744 (5)              | 931 (4)        | 213 (19)                        | 305 (18)       | 256 (14)                     | 381 (12)       | 112 (24)                     | 178 (22)       |
| <b>Ischaemic stroke</b>                         | 271 (2)              | 351 (2)        | 51 (5)                          | 59 (3)         | 52 (3)                       | 94 (3)         | 15 (3)                       | 27 (3)         |
| <b>Major haemorrhage*</b>                       | 220 (1)              | 260 (1)        | 23 (2)                          | 39 (2)         | 43 (2)                       | 49 (2)         | 11 (2)                       | 22 (3)         |

Presented as No. (%). \*Defined as Bleeding Academic Research Consortium type 3 or 5

**eFigure 1.** CONSORT Diagram of the Trial and Populations

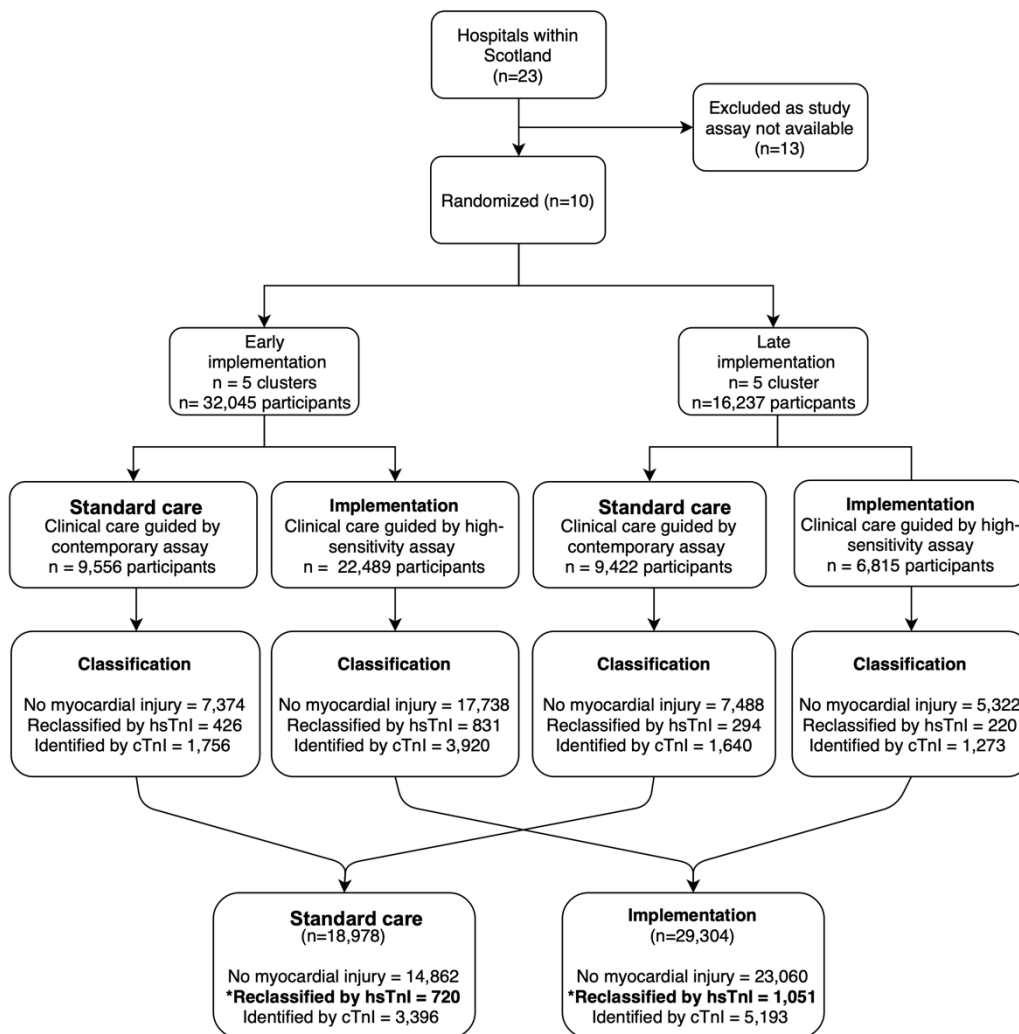

**eFigure 2. Outcomes at 5 years in patients reclassified by the high-sensitivity cardiac troponin I assay before and after implementation**

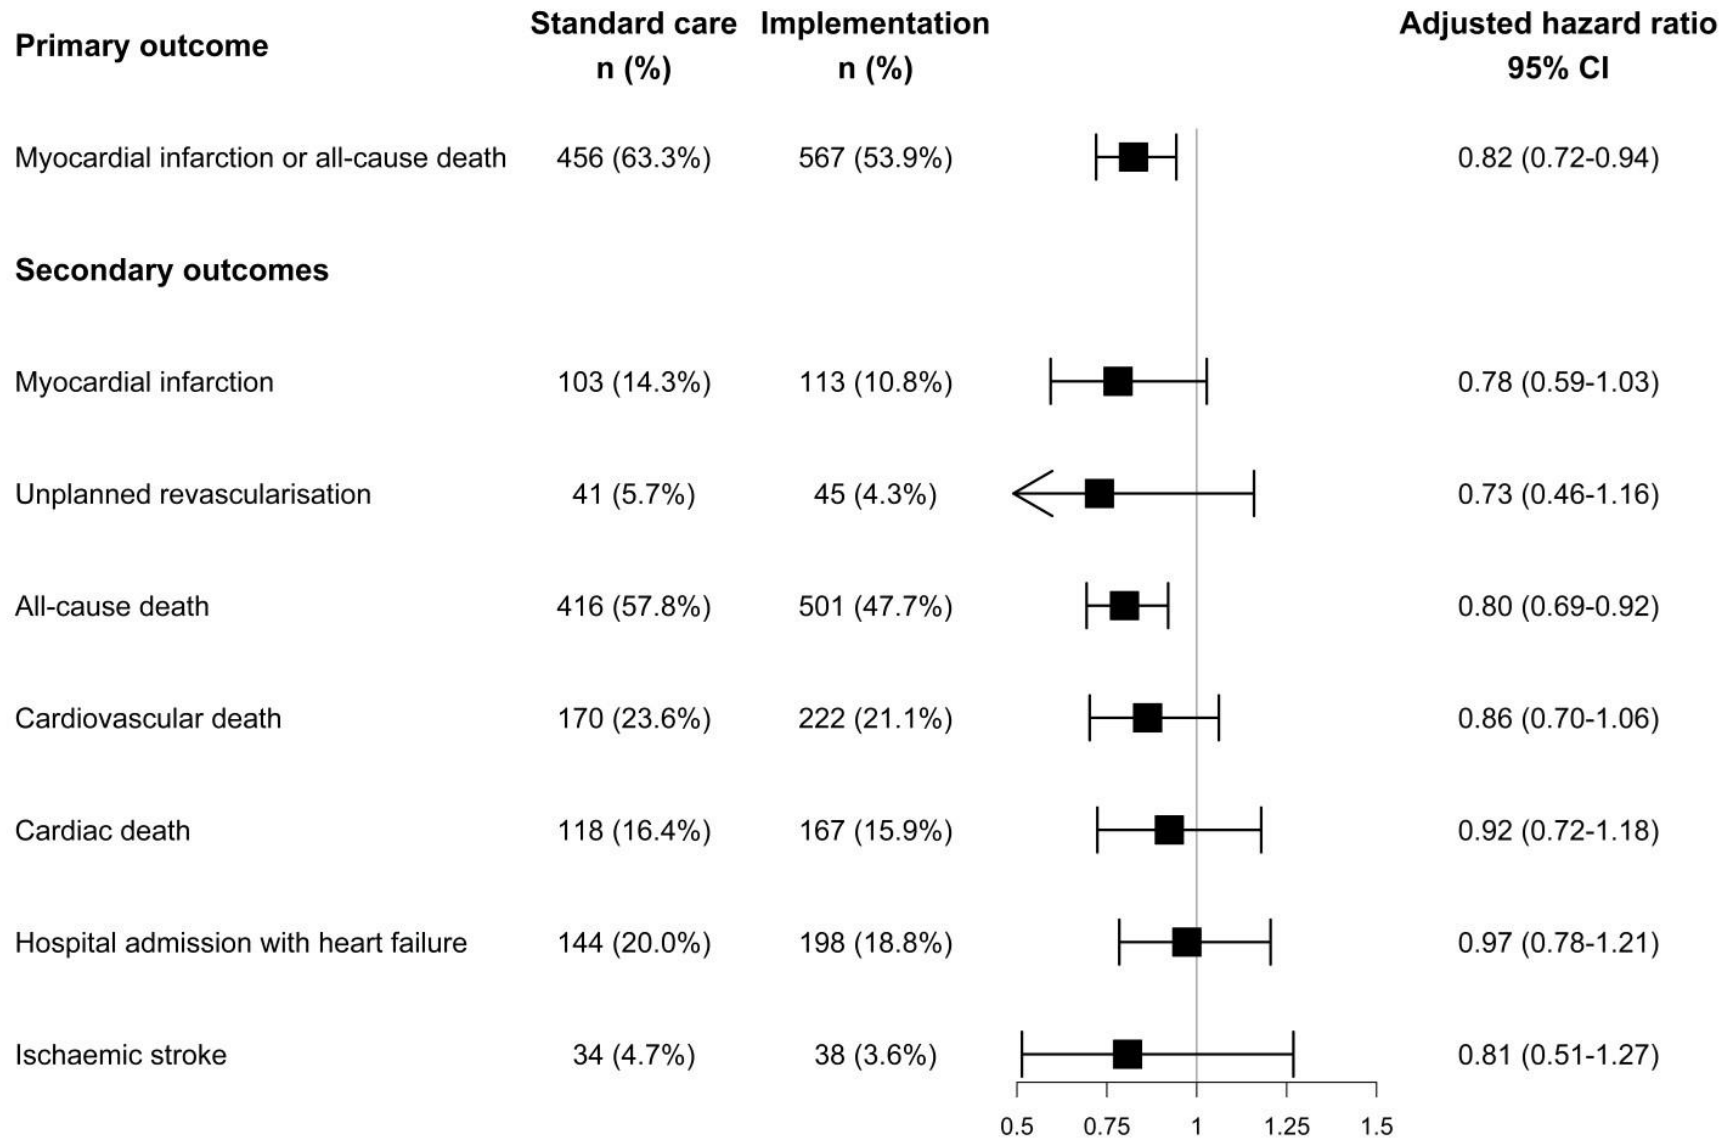

**eFigure 3. Outcomes at 5 years before and after implementation stratified by index diagnosis**

**A) Outcomes in patients with an index diagnosis of type 1 myocardial infarction.**

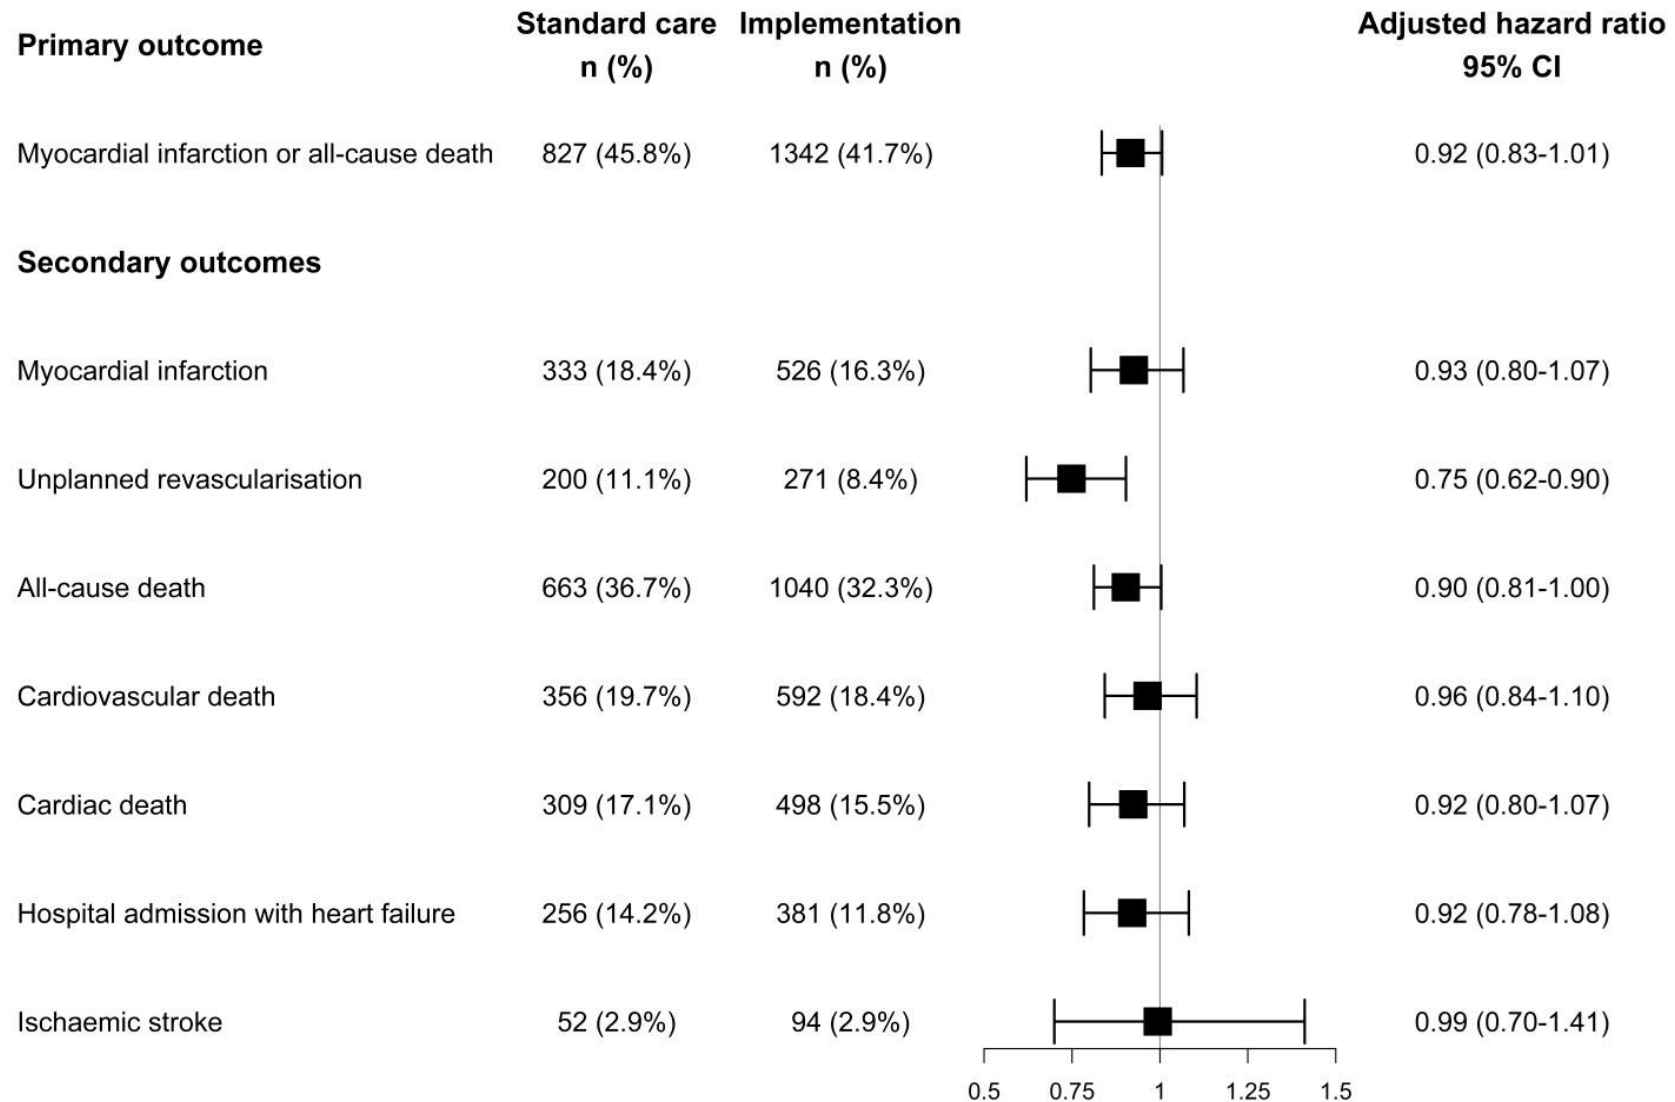

**B) Outcomes in patients with an index diagnosis of type 2 myocardial infarction.**

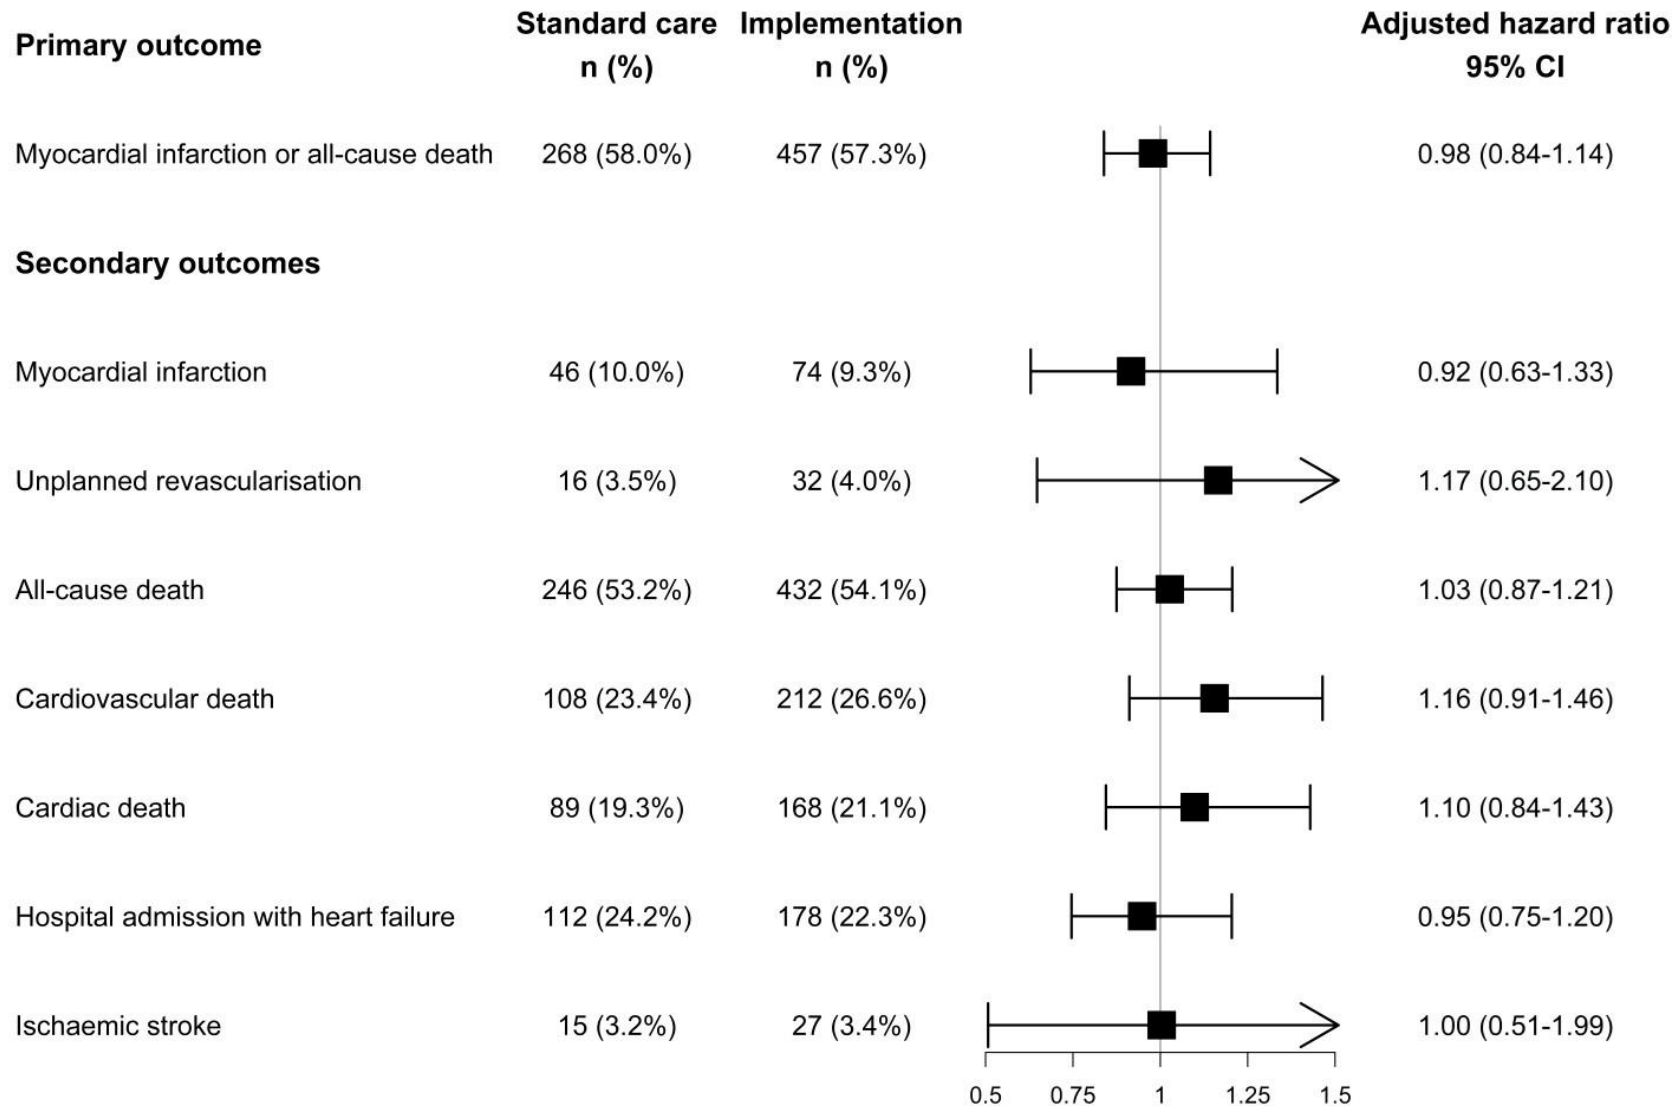

**C) Outcomes in patients with an index diagnosis of non-ischaemic myocardial injury.**

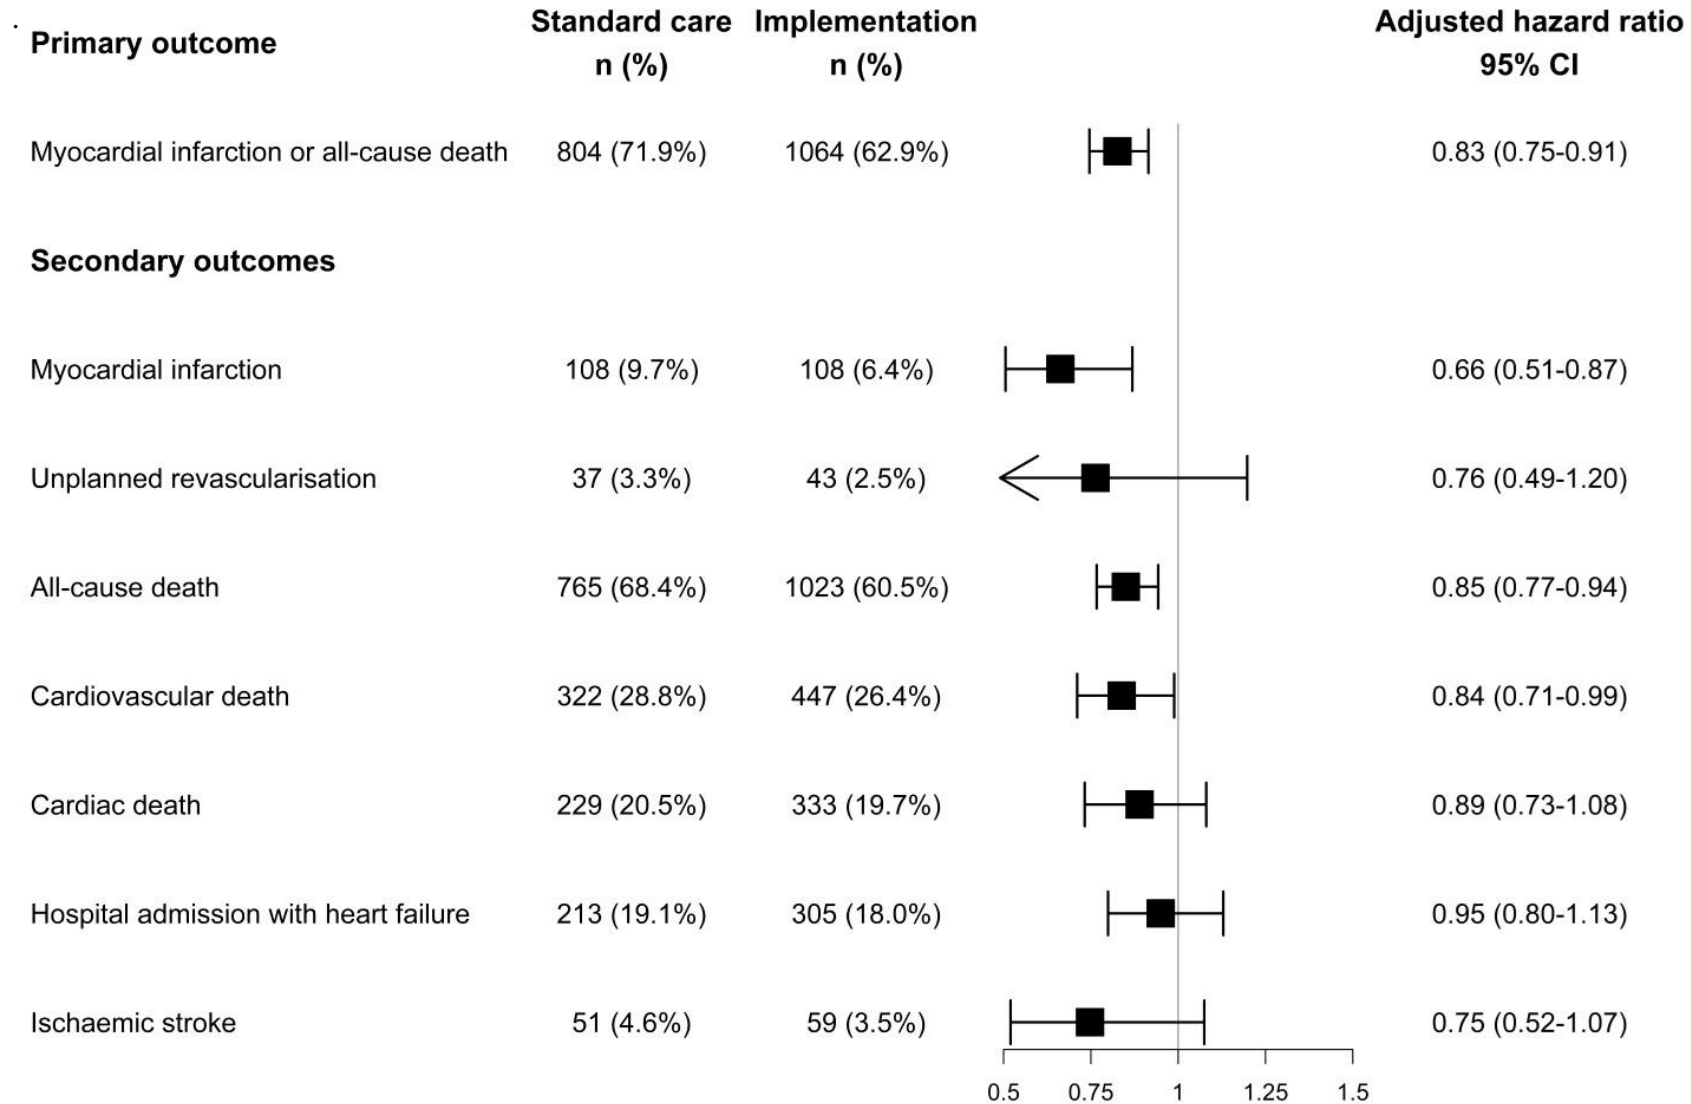



**eFigure 4. Outcomes at 5 years before and after implementation stratified by cause of non-ischaemic myocardial injury**

**A) Outcomes in patients with non-ischaemic myocardial injury due to a cardiac cause**

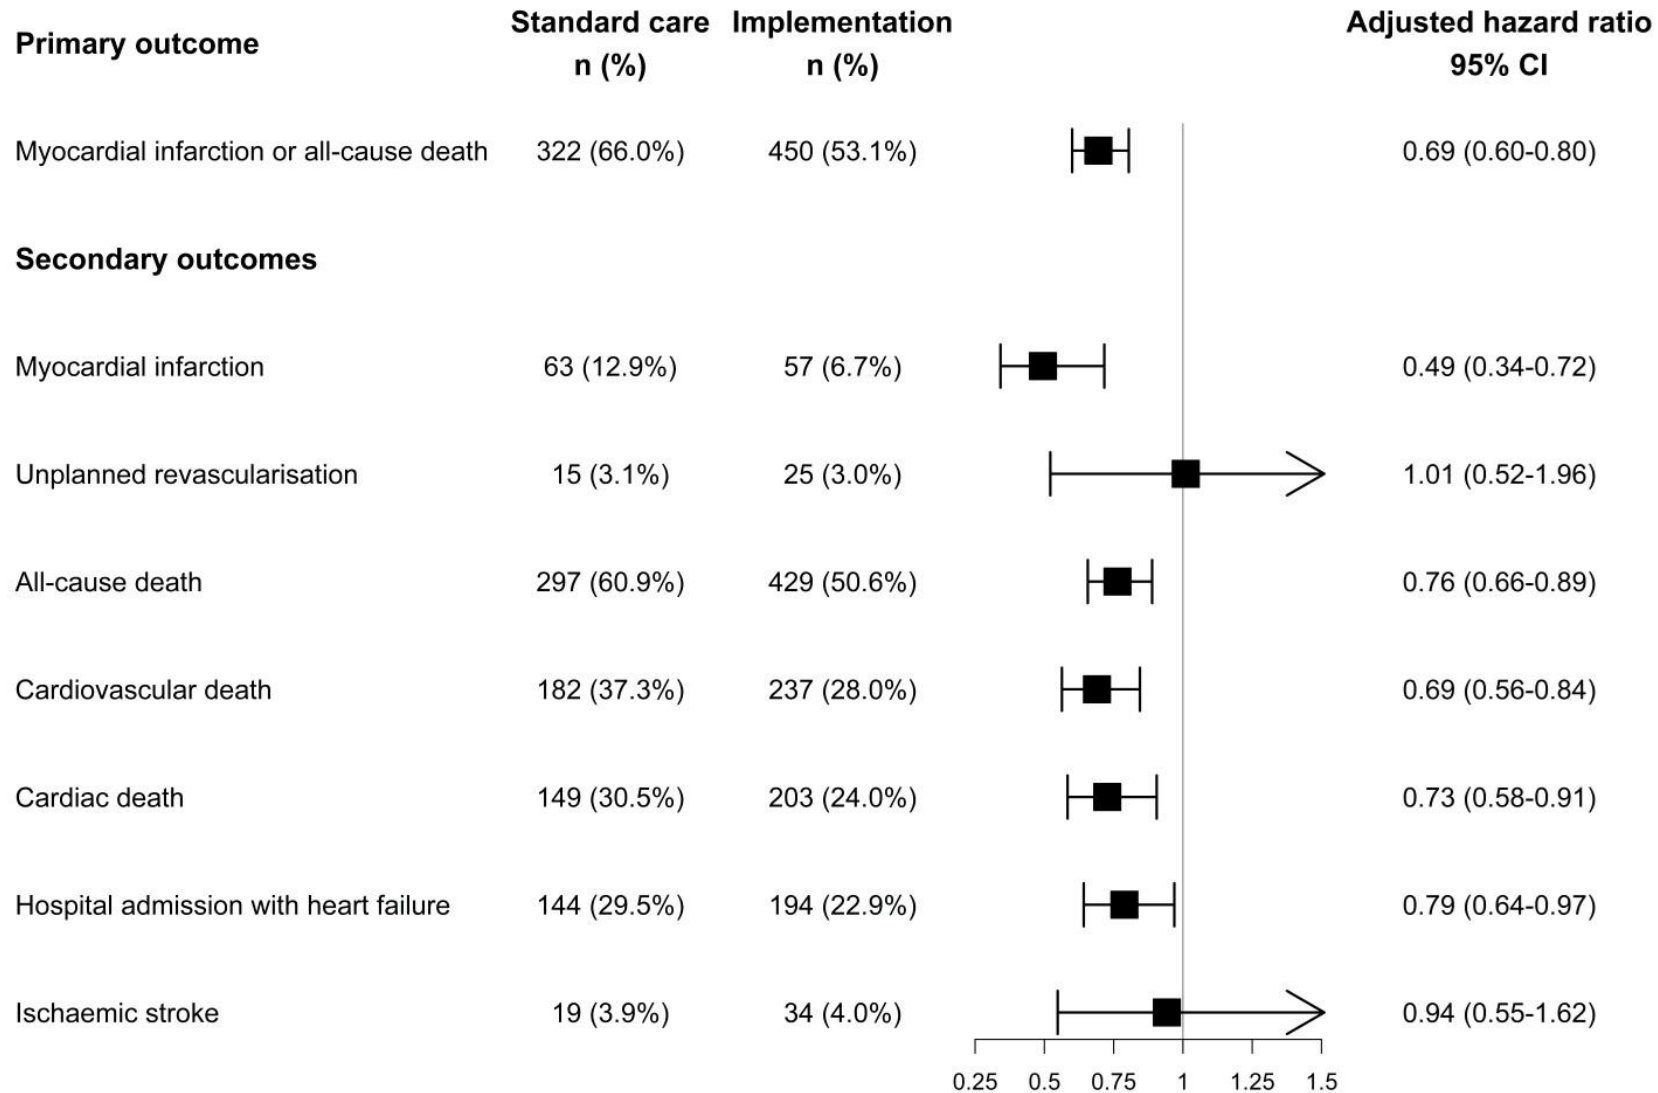

**B) Outcomes in patients with non-ischæmic myocardial injury due to a non-cardiac cause**

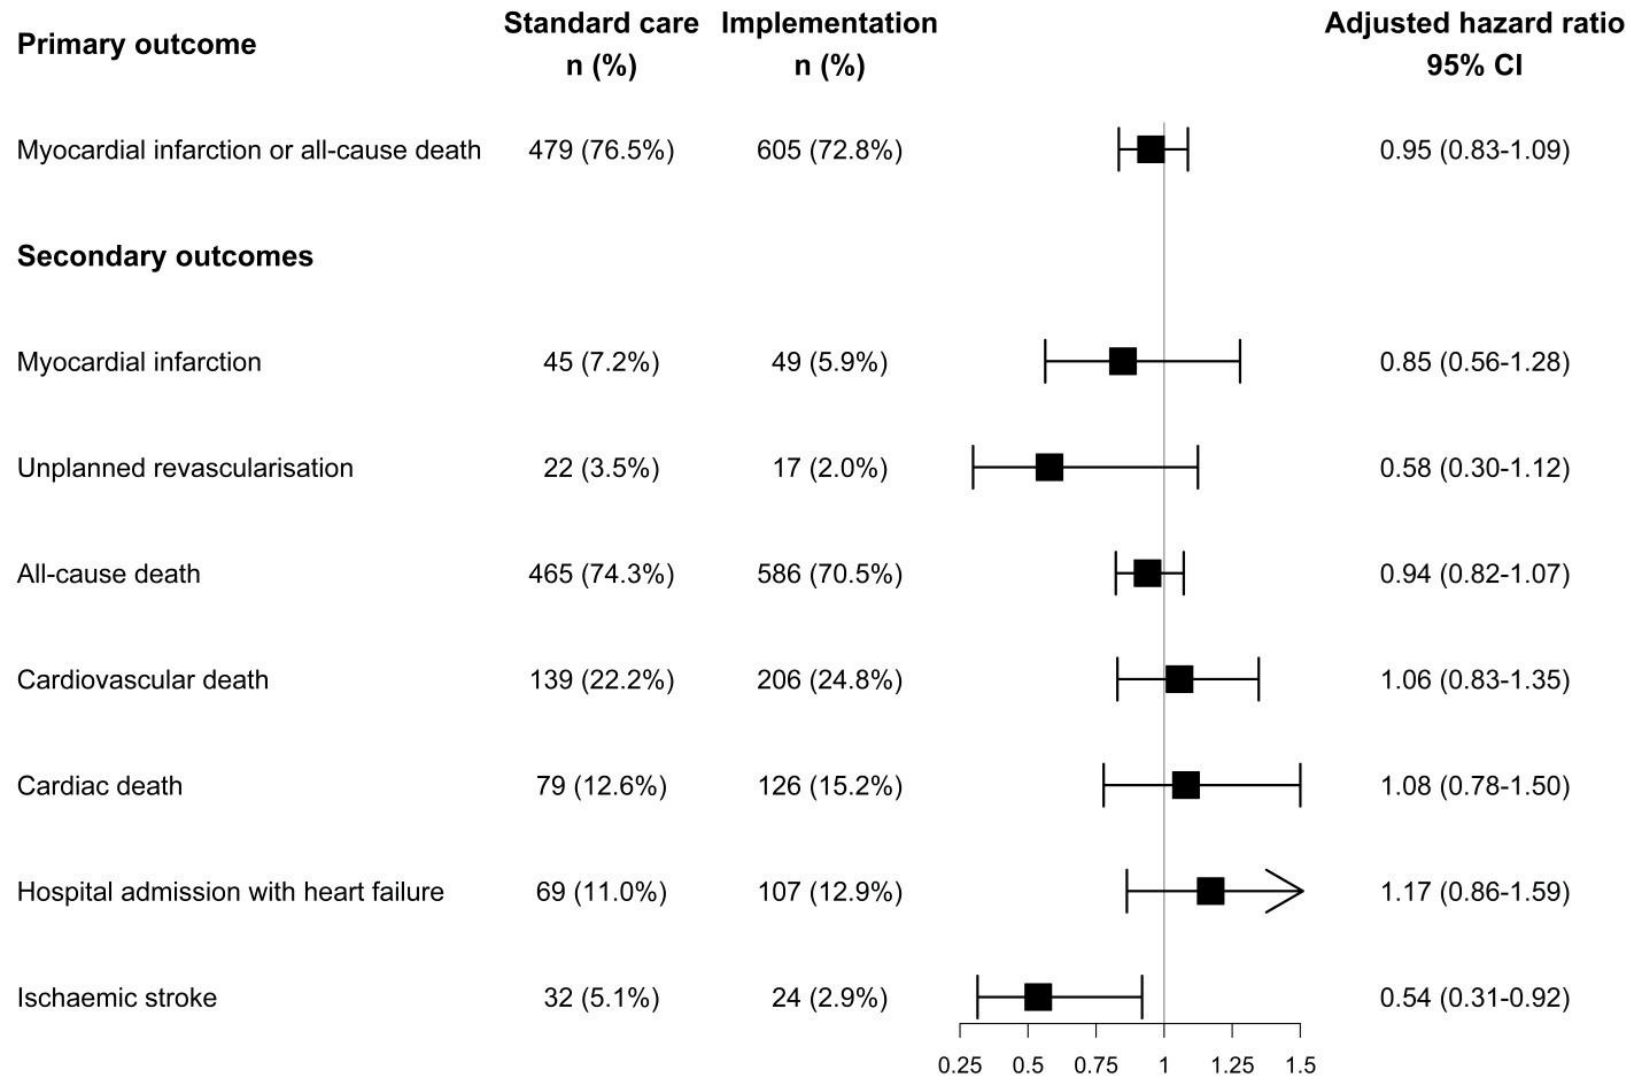

Supplement: leek075009.ww.pdf [file leek075009.ww.pdf]
